# Supplementary material
Source: PubMed Central journal article supplement (PMC3689224)
Supplement: NIHMS481755-supplement-Supplement.pdf [file NIHMS481755-supplement-Supplement.pdf]

**Table S1 Major mediators of resistance to *T. gondii* as defined by genetic knockouts in the mouse.**

| Immune gene                                    | Function                                                                                                                                                                                                    | Knockout Phenotype                                                                                                           |
|------------------------------------------------|-------------------------------------------------------------------------------------------------------------------------------------------------------------------------------------------------------------|------------------------------------------------------------------------------------------------------------------------------|
| IL-12                                          | Soluble cytokine comprised of heterodimer (p35, p40), secreted by dendritic cells, macrophages, and neutrophils, and drives production of IFN- $\gamma$ .                                                   | Acute susceptibility and failure to control parasite replication due to reduced production of IFN- $\gamma$ <sup>1,2</sup> . |
| IFN- $\gamma$                                  | Soluble cytokine produced by NK and T cells, mediates activation of cells by induction of anti-microbial gene expression, major mechanism of resistance to intracellular bacterial and protozoan pathogens. | Acute susceptibility and failure to control parasite replication <sup>3,4</sup> .                                            |
| TNF- $\alpha$                                  | Soluble cytokine secreted by leukocytes, stimulated by LPS and IFN- $\gamma$ , mediates second signal for activation of macrophages,, promotes innate NK cell responses.                                    | Required for control of chronic toxoplasmic encephalitis in normal <sup>5-7</sup> and SCID mice <sup>5</sup> .               |
| iNOS                                           | Inducible nitric oxide synthase, upregulated in response to endotoxin and IFN- $\gamma$ , produces diffusible nitric oxide, potent antimicrobial effector.                                                  | Acute resistance is normal but animals are susceptible to chronic toxoplasmic encephalitis <sup>8</sup> .                    |
| IGTP (IrgM3)<br>LRG-47 (IrgM1)<br>IIGP (Irga6) | Interferon regulated GTPases, family of GTPases strongly induced by IFN- $\gamma$ and involved in pathogen resistance.                                                                                      | Acute susceptibility is associated with reduced anti-microbial activity <sup>9,10</sup> .                                    |
| STAT1                                          | Signal transducers and activator of transcription 1, phosphorylated by JAK kinases downstream of IFN- $\gamma$ receptors, dimerizes, translocates to nucleus and activates gene transcription.              | Acute susceptibility is associated with reduced anti-microbial activity <sup>11,11</sup> .                                   |
| STAT4                                          | Transcription factor, phosphorylated by JAK kinases downstream of IL-12 receptors, dimerizes, translocates to nucleus and activates                                                                         | Acute susceptibility is associated with a failure to produce IFN- $\gamma$ <sup>12</sup> .                                   |

|                     |                                                                                                                                                                                                                                                      |                                                                                                                                                                               |
|---------------------|------------------------------------------------------------------------------------------------------------------------------------------------------------------------------------------------------------------------------------------------------|-------------------------------------------------------------------------------------------------------------------------------------------------------------------------------|
|                     | gene transcription.                                                                                                                                                                                                                                  |                                                                                                                                                                               |
| SOCS3               | Suppressor of cytokine signaling 3, downregulates JAK-STAT signaling.                                                                                                                                                                                | Acute susceptibility and failure to control parasite replication are reversed by blocking IL-6 or providing IL-12 <sup>13</sup> .                                             |
| RelB                | Subunit of nuclear factor kappa-B (NFkB), downstream of MyD88, drives expression of many cytokines.                                                                                                                                                  | Failure to produce IFN- $\gamma$ leads to susceptibility to acute infection <sup>14</sup> .                                                                                   |
| MyD88               | Common adapter for TLRs and IL-1R, signals in response to pathogen associated molecular patterns, and inflammation driven by the IL-1 family.                                                                                                        | Required for acute resistance to <i>T. gondii</i> through production of IL-12 and also has a role in T cells <sup>15 16</sup> .                                               |
| UNC93B1             | Resident ER protein, associated with regulation of TLR signaling.                                                                                                                                                                                    | Required for control of acute infection associated with a cell autonomous role in killing and the production of IL-12 <sup>17, 18</sup> .                                     |
| GBP <sup>chr3</sup> | A cluster encoding five separate guanylate binding proteins of the p65 family located on chromosome 3 in the mouse. GBP1, 2,3,5, and 7, along with a pseudogene of GBP2 are contained within this locus that was disrupted using flanking LoxP sites | Increased susceptibility to challenge with type II ME49 strain. Decreased ability to control intracellular replication in IFN- $\gamma$ activated macrophages <sup>19</sup> . |

- Khan, I.A., Matsuura, T. & Kasper, L.H. Interleukin-12 enhances murine survival against acute toxoplasmosis. *Infect Immun* 62, 1639-42 (1994).
- Yap, G., Pesin, M. & Sher, A. Cutting edge: IL-12 is required for the maintenance of ifn- $\gamma$  production in t cells mediating chronic resistance to the intracellular pathogen, toxoplasma gondii. *J Immunol* 165, 628-31 (2000).
- Suzuki, Y., Orellana, M.A., Schreiber, R.D. & Remington, J.S. Interferon- $\gamma$ : The major mediator of resistance against toxoplasma gondii. *Science* 240, 516-18 (1988).
- Yap, G.S. & Sher, A. Effector cells of both nonhemopoietic and hemopoietic origin are required for interferon (ifn)-gamma- and tumor necrosis factor (tnf)-alpha-dependent host resistance to the intracellular pathogen, toxoplasma gondii. *J. Exp. Med.* 189, 1083-91 (1999).
- Hunter, C.A., Abrams, J.S., Beaman, M.H. & Remington, J.S. Cytokine mrna in the central nervous system of scid mice infected with toxoplasma gondii: Importance of t-cell independent regulation of resistance to t. Gondii. *Infection and Immunity* 61, 4038-44 (1993).
- Yap, G.S., Scharton-Kersten, T., Charest, H. & Sher, A. Decreased resistance of tnf receptor p55- and p75-deficient mice to chronic toxoplasmosis despite normal activation of inducible nitric oxide synthase in vivo. *Journal of Immunology* 160, 1340-45 (1998).
- Deckert-Schlüter, M., Bluethmann, H., Rang, A., Hof, H. & Schluter, D. Crucial role of tnf receptor type 1 (p55), but not of tnf receptor type 2 (p75), in murine toxoplasmosis. *Journal of Immunology* 160, 3427-36 (1998).
- Scharton-Kersten, T.M., Yap, G., Magram, J. & Sher, A. Inducible nitric oxide is essential for host control of persistent but not acute infection with the intracellular pathogen toxoplasma gondii. *Journal of Experimental Medicine* 185, 1261-73 (1997).
- Collazo, C.M. et al. Inactivation of Irg-47 and irg-47 reveals a family of interferon  $\gamma$ -inducible genes with essential, pathogen-specific roles in resistance to infection. *J Exp Med* 194, 181-8. (2001).
- Taylor, G.A., Feng, C.G. & Sher, A. Control of ifn-gamma-mediated host resistance to intracellular pathogens by immunity-related gtpases (p47 gtpases). *Microb. Infect.* 9, 1644-51 (2007).
- Gavrilescu, L.C., Butcher, B.A., Del Rio, L., Taylor, G.A. & Denkers, E.Y. Stat1 is essential for antimicrobial effector function but dispensable for gamma interferon production during toxoplasma gondii infection. *Infect Immun.* 72, 1257-64 (2004).
- Cai, G., Radzanowski, T., Villegas, E.N., Kastelein, R. & Hunter, C.A. Identification of stat4-dependent and independent mechanisms of resistance to toxoplasma gondii1. *Journal of Immunology* 165, 2619-27 (2000).
- Whitmarsh, R.J. et al. A critical role for socs3 in innate resistance to toxoplasma gondii. *Cell Host Microbe* 10, 224-36 (2011).
- Caamaño, J., Alexander, J., Craig, L., Bravo, R. & Hunter, C.A. The nf-kb family member relb is required for innate and adaptive immunity to toxoplasma gondii1. *J Immunol* 163, 4453-61 (1999).
- Scanga, C.A. et al. Cutting edge: Myd88 is required for resistance to toxoplasma gondii infection and regulates parasite-induced il-12 production by dendritic cells. *J. Immunol.* 168, 5997-6001 (2002).
- LaRosa, D.F. et al. T cell expression of myd88 is required for resistance to toxoplasma gondii. *Proc Natl Acad Sci U S A* 105, 3855-60 (2008).
- Melo, M.B. et al. Unc93b1 mediates host resistance to infection with toxoplasma gondii. *PLoS Pathog* 6, e1001071 (2010).
- Pifer, R., Benson, A., Sturge, C.R. & Yarovinsky, F. Unc93b1 is essential for tlr11 activation and il-12-dependent host resistance to toxoplasma gondii. *J Biol Chem* 286, 3307-14 (2011).
- Yamamoto, M. et al. A cluster of interferon-gamma-inducible p65 gtpases plays a critical role in host defense against toxoplasma gondii. *Immunity* 37 (2012).

**Table S2 Host pathways altered by *T. gondii* infection**

| Target                        | Findings                                                                                                                                                                                                                                                                                                                                                                                                                                                                                                                                                                                                                                                                                                                                                                                                              |
|-------------------------------|-----------------------------------------------------------------------------------------------------------------------------------------------------------------------------------------------------------------------------------------------------------------------------------------------------------------------------------------------------------------------------------------------------------------------------------------------------------------------------------------------------------------------------------------------------------------------------------------------------------------------------------------------------------------------------------------------------------------------------------------------------------------------------------------------------------------------|
| Apoptosis                     | Infection of human foreskin fibroblasts (HFF) with type I RH strain parasites blocks multiple pathways of activating apoptosis <sup>20</sup> .<br>Infection of human HL-60 or U937 cells with the type II strain NTE blocks apoptosis induced by actinomycin D, TNF- $\alpha$ , and cyclohexamide <sup>21</sup> .<br>Infection of NIH 3T3 cells with type I RH strain parasites blocks caspase activation and inhibits apoptosis <sup>22</sup> .                                                                                                                                                                                                                                                                                                                                                                      |
| Cell cycle                    | Infection of HFF cells with the type I RH strain parasites stimulates G1/S transition followed by G2/M arrest, associated with sustained ERK activation <sup>23</sup> .<br>Infection of human trophoblast (BeWo) and normal human dermal fibroblasts (NHDF) with the type I RH strain parasites results in G2 arrest via cyclin B1 down regulation <sup>24</sup> .                                                                                                                                                                                                                                                                                                                                                                                                                                                    |
| DC maturation and trafficking | Type II PRU strain parasites preferentially infect immature murine bone-marrow derived DCs and blocks maturation induced by TLR ligands or CD40L <sup>25</sup> .<br>Infection of human monocyte-derived or murine bone marrow-derived DCs with type I RH strain parasites enhances motility and barrier migration <i>in vitro</i> , and <i>in vivo</i> dissemination in the mouse with DCs pulsed with the type II strain parasite PTG <sup>26</sup> .<br>DC are activated and expand in response to type II strains but this is reduced in Type I strains <sup>27</sup> .                                                                                                                                                                                                                                            |
| Host gene transcription       | Infection a clone of the type II strain ME49 induces transcription of many genes in HFF cells, including immune response pathways, glycolysis, and lipid metabolism <sup>28</sup> ; similar responses were seen in HFF cells infected with the type I RH strain <sup>29</sup> .<br>Infection with type I RH strain induces Hif1a in HFF cells and this response is important for parasite growth under hypoxic conditions <sup>30</sup> .<br>Induction of host EGR2 transcriptional response is due to rhopty discharge following infection of HFF cells by the type I RH strain <sup>31</sup> .<br>Differential expression of host cell transcriptional responses during infection of HFF cells by type II and III strain parasites drives development of immune responses including STATs and IL-12 <sup>32</sup> . |
| P38, JNK, ERK1/2              | Infection of human THP-1 monocyte cell line with type I strain RH induces phosphorylation of ERK1/2, P38, and JNKs <sup>33</sup> .<br>Transient activation of MAPK pathways in murine bone marrow derived macrophages cells infected with the type I RH strain is followed by suppression of LPS triggered responses <sup>34</sup> .<br>Soluble tachyzoite antigen from type I RH strain activates MAPK through TRAF6 that are required for IL-12 production <sup>35</sup> .                                                                                                                                                                                                                                                                                                                                          |
| NF $\kappa$ B                 | Proinflammatory cytokines triggered by LPS are blocked by inhibition of nuclear translocation of NF $\kappa$ B in response to infection with type I RH strain <sup>36</sup> .<br>The ability of LPS to induce NF $\kappa$ B activation is blocked by infection of bone marrow derived murine macrophages infected with type I RH strain <sup>37</sup> .                                                                                                                                                                                                                                                                                                                                                                                                                                                               |
| IL-12                         | IL-12 production is strongly induced by type II, but not type I or III strains in murine bone marrow derived and peritoneal macrophages <sup>38</sup> .<br>Infection of bone marrow derived murine macrophages with type II strain ME49 induces higher levels of IL-12 than infection with type I RH strain <sup>39</sup> .                                                                                                                                                                                                                                                                                                                                                                                                                                                                                           |
| IFN- $\gamma$                 | Induction of gene expression by treatment of HFF cells with IFN- $\gamma$ is blocked by infection with each of three strain types (I,II, III) <sup>40</sup> .<br>Induction of MHC I and MHC II by treatment of murine bone marrow derived macrophages cells with IFN- $\gamma$ is blocked by infection with type II NTE strain <sup>41</sup> .<br>Infection of murine bone marrow derived macrophages or RAW264 macrophages with the type II NTE strain down regulated induction of                                                                                                                                                                                                                                                                                                                                   |

|               |                                                                                                                                                                                                                                                                                                                                                                                                                                               |
|---------------|-----------------------------------------------------------------------------------------------------------------------------------------------------------------------------------------------------------------------------------------------------------------------------------------------------------------------------------------------------------------------------------------------------------------------------------------------|
|               | inducible nitric oxide by treatment with IFN- $\gamma$ <sup>42</sup> .<br>Infection of RAW264 macrophages with type I RH and type II ME49 strain parasites inhibited upregulation of MHC II by IFN- $\gamma$ , but only type I RH strain parasites were able to block induction of nitric oxide production <sup>43</sup>                                                                                                                      |
| STAT1         | Infection of bone marrow derived macrophages with type II NTE strain blocked IFN- $\gamma$ induced transcriptional changes by altering chromatin and disrupting STAT1 binding to nuclear promoters <sup>44</sup> .                                                                                                                                                                                                                            |
| SOCS-1        | Induction of SOCS-1 expression contributes to blocking of IFN- $\gamma$ signaling through STAT1 in murine BMM and RAW264 macrophages infected with type I BK strain parasites <sup>45</sup> .<br>SOCS1 expression in RAW264 macrophages cells is upregulated during infection with type I strain but not type II ME49 strain parasites; this pathway independent of TLR signaling but is regulated by EGR2 and p38 Map kinase <sup>43</sup> . |
| SOCS-3        | Infection with type I and II strains induces SOCS3 that limits IL-6 signaling and protects from immune pathology <sup>13</sup> .                                                                                                                                                                                                                                                                                                              |
| TNF- $\alpha$ | Infection with type I RH strain suppresses TNF- $\alpha$ mediated transcription in murine BMM and this occurs through chromatin modification <sup>46</sup> .                                                                                                                                                                                                                                                                                  |
| STAT3         | Infection with live type I RH strain, but not treatment with lysates, induces STAT3 activation in murine bone marrow derived macrophages and suppresses IL-12 and TNF- $\alpha$ <sup>47</sup> .                                                                                                                                                                                                                                               |

- Nash, P.B. et al. Toxoplasma gondii-infected cells are resistant to multiple inducers of apoptosis. *Journal of Immunology* 160, 1824-30 (1998).
- Goebel, S., Gross, U. & Lüder, C.G.K. Inhibition of host cell apoptosis by toxoplasma gondii is accompanied by reduced activation of the caspase cascade and alterations of the poly(ADP-ribose) polymerase expression. *J. Cell Sci.* 114, 3495-505 (2001).
- Payne, T.M., Molestina, R.E. & Sinai, A.P. Inhibition of caspase activation and a requirement for nf-kb function in the toxoplasma gondii-mediated blockade of host apoptosis. *J. Cell Science* 116, 4345-58 (2003).
- Molestina, R.E., El-Guendy, N. & Sinai, A.P. Infection with toxoplasma gondii results in dysregulation of the host cell cycle. *Cell Microbiol* 10, 1153-65 (2008).
- Brunet, J. et al. Toxoplasma gondii exploits Uhrf1 and induces host cell cycle arrest at G2 to enable its proliferation. *Cell Microbiol* 10, 908-20 (2008).
- McKee, A.S., Dzierszinski, F., Boes, M., Roos, D.S. & Pearce, E.J. Functional inactivation of immature dendritic cells by the intracellular parasite toxoplasma gondii. *J Immunology* 173, 2632-40. (2004).
- Lambert, H., Hitziger, N., Dellacasa, I., Svensson, M. & Barragan, A. Induction of dendritic cell migration upon toxoplasma gondii infection potentiates parasite dissemination. *Cell Micro.* 8, 1611-23 (2006).
- Tait, E.D. et al. Virulence of toxoplasma gondii is associated with distinct dendritic cell responses and reduced numbers of activated CD8+ T cells. *J Immunol* 185, 1502-12 (2010).
- Blader, I., Manger, I.D. & Boothroyd, J.C. Microarray analysis reveals previously unknown changes in toxoplasma gondii infected human cells. *J. Biol. Chem.* 276, 24223-31 (2001).
- Gail, M., Gross, U. & Bohne, W. Transcriptional profile of toxoplasma gondii infected human fibroblasts as revealed by gene-array hybridization. *Mol Genet Genomics* 265, 905-12 (2001).
- Spear, W. et al. The host cell transcription factor hypoxia-inducible factor 1 is required for toxoplasma gondii growth and survival at physiological oxygen levels. *Cell Microbiol* 8, 339-52 (2006).
- Phelps, E.D., Sweeney, K.R. & Blader, I.J. Toxoplasma gondii rhoptry discharge correlates with activation of the early growth response 2 host cell transcription factor. *Infect Immun* 76, 4703-12 (2008).
- Saeij, J.P.J. et al. Toxoplasma co-opts host gene expression by injection of a polymorphic kinase homologue. *Nature* 445, 324-27 (2007).
- Valere, A. et al. Activation of the cellular mitogen-activated protein kinase pathways erk, p38 and jnk during toxoplasma gondii invasion. *Parasite* 10, 59-64 (2003).
- Kim, L., Butcher, B.A. & Denkers, E.Y. Toxoplasma gondii interferes with lipopolysaccharide-induced mitogen-activated protein kinase activation by mechanisms distinct from endotoxin tolerance. *J Immunol* 172, 3003-10 (2004).
- Mason, N.J. et al. Traf6-dependent mitogen-activated protein kinase activation differentially regulates the production of interleukin-12 by macrophages in response to toxoplasma gondii. *Infection and Immunity* 72, 5662-67 (2004).
- Butcher, B.A., Kim, L., Johnson, P.F. & Denkers, E.Y. Toxoplasma gondii tachyzoites inhibit proinflammatory cytokine induction in infected macrophages by preventing nuclear translocation of the transcription factor NF- $\kappa$ B. *Journal of Immunology* 167, 2193-201 (2001).
- Shapira, S., Speirs, K., Gerstein, A., Caamano, J. & Hunter, C.A. Suppression of NF- $\kappa$ B activation by infection with toxoplasma gondii. *Journal of Infectious Diseases* 185, S66-S72 (2002).
- Robben, P.M. et al. Production of IL-12 by macrophages infected with toxoplasma gondii depends on the parasite genotype. *J. Immunol.* 172, 3686-94 (2004).
- Kim, L. et al. Toxoplasma gondii genotype determines MyD88-dependent signaling in infected macrophages. *J. Immunol.* 177, 2584-91 (2006).
- Kim, S.K., Fouts, A.E. & Boothroyd, J.C. Toxoplasma gondii dysregulates IFN- $\gamma$  inducible gene expression in human fibroblasts: Insights from a genome-wide transcriptional profiling. *J. Immunol.* 178, 5154-65 (2007).
- Lüder, C.G.K., Lang, T., Beuerle, B. & Gross, U. Down-regulation of MHC class II molecules and inability to up-regulate class I molecules in murine macrophages after infection with toxoplasma gondii. *Clinical and Experimental Immunology* 112, 308-16 (1998).
- Lüder, C.G., Algnier, M., Lang, C., Bleicher, N. & Gross, U. Reduced expression of the inducible nitric oxide synthase after infection with toxoplasma gondii facilitates parasite replication in activated murine macrophages. *Int J Parasitol* 33, 833-44 (2003).
- Stutz, A., Kessler, H., Kaschel, M.E., Meissner, M. & Dalpke, A.H. Cell invasion and strain dependent induction of suppressor of cytokine signaling-1 by toxoplasma gondii. *Immunobiology* 217, 28-36 (2012).
- Lang, C. et al. Impaired chromatin remodelling at STAT1-regulated promoters leads to global unresponsiveness of toxoplasma gondii-infected macrophages to IFN- $\gamma$ . *PLoS Pathog* 8, e1002483 (2012).
- Zimmermann, S., Murray, P.J., Heeg, K. & Dalpke, A.H. Induction of suppressor of cytokine signaling-1 by toxoplasma gondii contributes to immune evasion in macrophages by blocking IFN- $\gamma$  signaling. *Journal of Immunology* 176, 1840-47 (2006).
- Whitmarsh, R.J. et al. A critical role for SOCS3 in innate resistance to toxoplasma gondii. *Cell Host Microbe* 10, 224-36 (2011).
- Leng, J., Butcher, B.A., Egan, C.E., Abdallah, D.S. & Denkers, E.Y. Toxoplasma gondii prevents chromatin remodeling initiated by TLR-triggered macrophage activation. *J Immunol* 182, 489-97 (2009).
- Butcher, B.A. et al. Cutting edge: IL-10-independent STAT3 activation by toxoplasma gondii mediates suppression of IL-12 and TNF- $\alpha$  in host macrophages. *Journal of Immunology* 174, 3148-52 (2005).
